# Supplementary material for: Ambulatory human chorionic gonadotrophin (hCG) testing: a verification of two hCG point of care devices
Source: publisher site journal article supplement (doi:10.1515/cclm-2023-0703), 2023-10-27
Supplement: Supplementary file 1 [file j_cclm-2023-0703_suppl_001.docx]

**Table S1:** Summary of characteristics for the i-STAT 1 and the AQT 90 FLEX

|  | **i-STAT 1** | **AQT 90 FLEX** |
| --- | --- | --- |
| **Sample type** | Untreated/lithium-heparin whole blood and plasma | EDTA/lithium-heparin whole blood and plasma |
| **Volume** | 17 μL | 56 μL |
| **Sample requirements** | Untreated whole blood must be tested within one minute. Otherwise, fresh sample must be tested as soon as possible within 30 minutes if not freezing | Fresh sample must be tested as soon as possible within 3 hours if not freeing |
| **Reagents** | Murine Antibody/Alkaline Phosphatase Conjugate IgG  Murine IgG  Murine IgM  Sodium Aminophenyl Phosphate  Heparin Porcine Intestine | Murine anti-βhCG capturing/tracing antibodies  Native βhCG  Bovine serum albumin  Bovine γ-globulin  Murine IgG  TRIS (tris hydroxymethylamino­methane) buffer |
| **Reagent storage** | Store cassettes unopened at 2-8°C. Once at room temperature, cassettes must be used within 14 days. Will not allow use of cassette beyond documented expiry date | Store cartridges unopened at 2-8°C. Once at room temperature, cartridges must be used before on-board expiry, printed on the side. Will not allow use of cartridge beyond documented expiry date |
| **Calibration and QC** | Onboard software updated every six months for device to remain calibrated to latest cassettes/QC.  3-step liquid QC performed with every new cassette LOT (3 x 10 minutes).  Mechanical QC performed daily using manufacturer simulator (2 minutes) | One-point calibration is performed each time a new cartridge used (1 x 30 minutes).  2-step liquid QC performed after each calibration and once a week (2 x 20 minutes) |

Abbreviations: QC: Quality control.

**Table S2:** Summary of characteristics for the Architect, the Alinity, and the Beckman

|  | **Architect** | **Alinity** | **Beckman** |
| --- | --- | --- | --- |
| **Sample type** | Plasma from lithium-heparin, sodium-heparin or EDTA containers or serum specimens | Plasma from lithium-heparin, sodium-heparin or EDTA containers or serum specimens | Serum and lithium-heparin plasma |
| **Volume** | 75 μL for the first test plus 25 μL for each additional test from the same sample cup | 75 μL for the first test plus 25 μL for each additional test from the same sample cup | 25 µL in addition to the sample container and system dead volumes |
| **Sample requirements** | Sample can be stored at 2 to 8°C for ≤7 days. If testing delayed >7 days, specimens should be frozen at <-10°C for 12 months | Sample can be stored at 2 to 8°C for ≤7 days. If testing delayed >7 days, specimens should be frozen at <-10°C for 12 months | Store samples at 15 to 30°C for <8 hours. Sample can be stored at 2 to 8°C for 48 hours. If testing delayed >48 hours, specimens should be frozen at <-20°C |
| **Reagents** | Murine anti-β-hCG coated microparticles in TRIS (tris hydroxymethylamino­methane) buffer with bovine protein stabilizers  Murine anti-β-hCG acridinium-labeled conjugate in MES buffer with bovine protein stabilizers  ARCHITECT Multi-Assay Manual Diluent  ARCHITECT Pre-Trigger Solution  ARCHITECT Trigger Solution | Murine anti-β-hCG coated microparticles in TRIS buffer with bovine protein stabilizers  Murine anti-β-hCG acridinium-labeled conjugate in MES (2-ethanesulfonic acid) buffer with bovine protein stabilizers  ALINITY Multi-Assay Manual Diluent and Wash Buffer  ALINITY Pre-Trigger Solution  ALINITY Trigger Solution | Paramagnetic particles with goat anti-mouse IgG  Murine anti-βhCG complexes suspended in TRIS buffered saline, with surfactant, BSA (bovine serum albumin), sodium azide, and ProClin 300  Protein (goat, murine, and recombinant) diluted in citrate buffered saline  Rabbit anti‐βhCG alkaline phosphatase (recombinant) conjugate diluted in MES buffered saline |
| **Reagent storage** | Store reagents unopened 2-8°C until expiration date. If reagents on board, should be discarded at 30 days | Store reagents unopened 2-8°C until expiration date. If reagents on board, should be discarded at 30 days | Store upright and refrigerate at 2 to 10°C until expiration date. Stable at 2 to 10°C for 28 days |
| **Calibration and QC** | 6 calibrators run in duplicate every 30 days. Once ARCHITECT Total β-hCG calibration is accepted and stored, all subsequent samples may be tested without further calibration unless: a reagent kit with a new lot number is used/any QC is out of range.  Three QC levels tested once every 24 hours and after each calibration | 6 calibrators run in duplicate every 30 days. Once ALINITY Total β-hCG calibration is accepted and stored, all subsequent samples may be tested without further calibration unless: a reagent kit with a new lot number is used/any QC is out of range.  Three QC levels tested once every 24 hours and after each calibration | 6 level calibratiors run in duplicate every 28 days.  Commercially available QC materials used to cover at least two levels of analyte every 24 hours and after each calibration |

Abbreviations: QC: Quality control.

**Table S3:** Usability questionnaire for point of care testing verification using Likert scale. 1 = Strongly disagree; 5 = Strongly agree

| **Usefulness** | | | | | | | | |
| --- | --- | --- | --- | --- | --- | --- | --- | --- |
| 1. Allows me to complete tasks easily. | 1 | 2 | 3 | 4 | 5 |  |  |
| 2. Allows me to complete tasks quickly. | 1 | 2 | 3 | 4 | 5 |  |  |
| 3. Helps me be more effective. | 1 | 2 | 3 | 4 | 5 |  |  |
| 4. Helps me be more efficient. | 1 | 2 | 3 | 4 | 5 |  |  |
| 5. Allows me better control to perform my tasks. | 1 | 2 | 3 | 4 | 5 |  |  |
| 6. Helps me be more productive in my work. | 1 | 2 | 3 | 4 | 5 |  |  |
| 7. Allows me to ensure patient safety. | 1 | 2 | 3 | 4 | 5 |  |  |
| **Ease of use** | | | | | | | | |
| 8. Is it easy to use? | 1 | 2 | 3 | 4 | 5 |  |  |
| 9. Is it user friendly? | 1 | 2 | 3 | 4 | 5 |  |  |
| 10. Requires few steps to accomplish my work. | 1 | 2 | 3 | 4 | 5 |  |  |
| 11. Allows flexible use according to my needs. | 1 | 2 | 3 | 4 | 5 |  |  |
| 12. Doesn’t require physical effort to use. | 1 | 2 | 3 | 4 | 5 |  |  |
| 13. Doesn’t require mental effort to use. | 1 | 2 | 3 | 4 | 5 |  |  |
| 14. Allows me to complete tasks logically. | 1 | 2 | 3 | 4 | 5 |  |  |
| 15. Isn’t associated with large error possibility in its use. | 1 | 2 | 3 | 4 | 5 |  |  |
| 16. Allows me to recover from mistakes quickly and easily. | 1 | 2 | 3 | 4 | 5 |  |  |
| **Ease of learning** | | | | | | | |
| 17. I learned to use it quickly. | 1 | 2 | 3 | 4 | 5 |  |  |
| 18. I learned to use it easily. | 1 | 2 | 3 | 4 | 5 |  |  |
| 19. I easily remember how to use it. | 1 | 2 | 3 | 4 | 5 |  |  |
| 20. I quickly became skillful with it. | 1 | 2 | 3 | 4 | 5 |  |  |
| 21. Not necessary to have much previous knowledge to use it. | 1 | 2 | 3 | 4 | 5 |  |  |
| 22. Not necessary to have written instructions to use it. | 1 | 2 | 3 | 4 | 5 |  |  |
| 17. I learned to use it quickly. | 1 | 2 | 3 | 4 | 5 |  |  |
| **Satisfaction** | | | | | | | |
| 23. I feel confident in using it. | 1 | 2 | 3 | 4 | 5 |  |  |
| 24. I feel secure in using it. | 1 | 2 | 3 | 4 | 5 |  |  |
| 25. I am satisfied with it and will use frequently. | 1 | 2 | 3 | 4 | 5 |  |  |
| 26. I would recommend it to colleagues. | 1 | 2 | 3 | 4 | 5 |  |  |

**Table S4:** Point of care testing (POCT) performance compared with laboratory when utilizing serum and EDTA-stabilised plasma samples

| **Sample type** | **Serum** | | **EDTA-plasma** | | **Serum** | **EDTA-plasma** |
| --- | --- | --- | --- | --- | --- | --- |
| **Processing method** | **POCT** | **Lab** | **POCT** | **Lab** | **POCT** | |
| **i-STAT 1, N** | 26 | | 26 | | 24 | |
| **Group means of log transformed data, natural log units** | 5.4† | 5.5† | 5.1* | 5.7* | 5.5† | 4.9* |
| **Symmetric difference with POCT, %** |  | 1.0† |  | 65.6* |  | 64.5*† |
| **AQT, N** | 50 | | 29 | | 29 | |
| **Group means of log transformed data, natural log units** | 6.6† | 6.5† | 5.6 | 5.5 | 5.6† | 5.6 |
| **Symmetric difference with POCT, %** |  | 9.0† |  | 2.7 |  | 3.2† |

*i-STAT 1 device not validated for use with EDTA-plasma samples so highly inaccurate results presented above are NA.

†i-STAT 1 and AQT devices not validated for use with serum samples so highly inaccurate results presented above are NA.

Abbreviations: lab: Laboratory; log: Logarithm; NA: Not applicable.

**Table S5:** Recovery of 5th international hCG standard from serum using laboratory and point of care testing methods (N=1, diluted, duplicate)

| **Diluted standard (IU/L)** | **Recovery i-STAT 1 (IU/L)** | **Recovery rate i-STAT 1 (%)** | **Recovery AQT (IU/L)** | **Recovery rate AQT (%)** | **Recovery laboratory (IU/L)** | **Recovery rate laboratory (%)** |
| --- | --- | --- | --- | --- | --- | --- |
| **1860** | 1632.1 | 88 | 1661 | 89 | 1709.6 | 92 |
| **930** | 794.5 | 85 | 798 | 86 | 850.1 | 91 |
| **465** | 401.7 | 86 | 396.5 | 85 | 430.0 | 92 |
| **232.5** | 193 | 83 | 188 | 81 | 208.0 | 89 |
| **116.3** | 86.4 | 74 | 95 | 82 | 101.4 | 87 |
| **58.1** | 45.0 | 77 | 46.5 | 80 | 52.7 | 91 |
| **29.1** | 23.4 | 81 | 25.5 | 88 | 26.5 | 91 |
| **0** | < | NA | < | NA | < | NA |
| **Average recovery rate (%)** | | **82*** |  | **84*** |  | **91** |

*i-STAT 1 and AQT devices not validated for use with serum samples.

Abbreviations: NA: Not applicable.

**Table S6:** Recovery of 5th international hCG standard from whole blood using laboratory and point of care testing methods prior to considering impact of hematocrit:

1. i-STAT 1 (N=2, diluted, duplicate/quadruplicate)

| **Diluted standard (IU/L)** | **Recovery EDTA (IU/L)** | **Recovery rate EDTA (%)** | **Recovery LH (IU/L)** | **Recovery rate LH (%)** | **Recovery EDTA + LH (IU/L)** | **Recovery rate EDTA + LH (%)** |
| --- | --- | --- | --- | --- | --- | --- |
| **1860** | > | NA | > | NA | > | NA |
| **930** | 1388.9 | 149 | 1650.9 | 178 | 1563.6 | 168 |
| **465** | 685.6 | 147 | 1073.9 | 231 | 944.5 | 203 |
| **232.5** | 363.5 | 156 | 439.9 | 189 | 401.7 | 173 |
| **116.3** | 167.6 | 144 | 176.1 | 151 | 171.9 | 148 |
| **58.1** | 80.9 | 139 | 83.6 | 144 | 82.2 | 141 |
| **29.1** | 50.6 | 174 | 42.4 | 146 | 46.5 | 160 |
| **0** | < | NA | < | NA | < | NA |
| **Average recovery rate (%)** | | **152*** |  | **173** |  | **166*** |

1. AQT 90 FLEX (N=2, diluted, duplicate/quadruplicate)

| **Diluted standard (IU/L)** | **Recovery EDTA (IU/L)** | **Recovery rate EDTA (%)** | **Recovery LH (IU/L)** | **Recovery rate LH (%)** | **Recovery EDTA + LH (IU/L)** | **Recovery rate EDTA + LH (%)** |
| --- | --- | --- | --- | --- | --- | --- |
| **1860** | 3155.8 | 170 | 3004.5 | 162 | 3105.3 | 167 |
| **930** | 1476.5 | 159 | 1599 | 172 | 1517.3 | 163 |
| **465** | 743.5 | 160 | 627 | 135 | 704.7 | 152 |
| **232.5** | 384.3 | 165 | 369 | 159 | 379.2 | 163 |
| **116.3** | 184.3 | 158 | 178.5 | 154 | 182.3 | 157 |
| **58.1** | 90.8 | 156 | 90.5 | 156 | 90.7 | 156 |
| **29.1** | 49.8 | 171 | 44 | 151 | 47.8 | 165 |
| **0** | < | NA | < | NA | < | NA |
| **Average recovery rate (%)** | | **163** |  | **155** |  | **160** |

*i-STAT 1 device not validated for use with EDTA whole blood samples.

Abbreviations: EDTA: EDTA-stabilized whole blood; LH: lithium-heparin-stabilized blood; NA: Not applicable.

**Figure S1:** Correlating point of care testing hCG values within quantitative device detection ranges following serum sample processing, with paired serum sample laboratory hCG values:

1. i-STAT 1: Correlation curve and summary data (N=26)*

| **Summary data** | |
| --- | --- |
| **Symmetric difference, %** | 1.0 |
| **Correlation coefficient - R (95% CI)** | 0.99 (0.98->0.99) |
| **Regression coefficients (95% CI)** | Slope 1.1 (1.0-1.1)  Y-intercept -21.6 (-70.9-27.8)  X-intercept 20.1 (-26.9-63.4) |
| **Goodness of fit - R2** | 0.98 |

1. AQT 90 FLEX: Correlation curve and summary data (N=50)*

| **Summary data** | |
| --- | --- |
| **Symmetric difference, %** | 9.0 |
| **Correlation coefficient - R (95% CI)** | >0.99 (0.99->0.99) |
| **Regression coefficients (95% CI)** | Slope 1.1 (1.1-1.1)  Y-intercept 37.0 (-15.0-88.9)  X-intercept -34.1 (-83.5-13.6) |
| **Goodness of fit - R2** | 0.99 |

1. Bland-Altman Bias:
   1. i-STAT 1 (N=26)* ii. AQT 90 FLEX (N=50)*

| **Bias, IU/L (SD)** | 21.7 (93.9) |
| --- | --- |
| **95% LOA, IU/L** | -162.2 to 205.7 |

| **Bias, IU/L (SD)** | 175.2 (160.5) |
| --- | --- |
| **95% LOA, IU/L** | -139.3 to 489.6 |

iii. i-STAT 1 versus AQT 90 FLEX (N=26)*

| **Bias, IU/L (SD)** | -56.2 (106.6) |
| --- | --- |
| **95% LOA, IU/L** | -265 to 152.7 |

*All point of care testing and laboratory devices measure total beta-hCG (i.e., both intact hCG and free beta-hCG subunits).

Abbreviations: HCG: Human chorionic gonadotrophin; SD: Standard deviation; 95% CI: 95% confidence interval; 95% LOA: 95% limits of agreement.
